# Supplementary material for: Characterization, Antioxidant Potential, and Pharmacokinetics Properties of Phenolic Compounds from Native Australian Herbs and Fruits
Source: MDPI journal article supplement (doi:10.3390/plants12050993), 2023-02-21
Supplement: s1 [file s1]

## Supplementary Materials

### Characterization, Antioxidant Potential, and Pharmacokinetics Study of Phenolic Compounds from Native Australian Plants

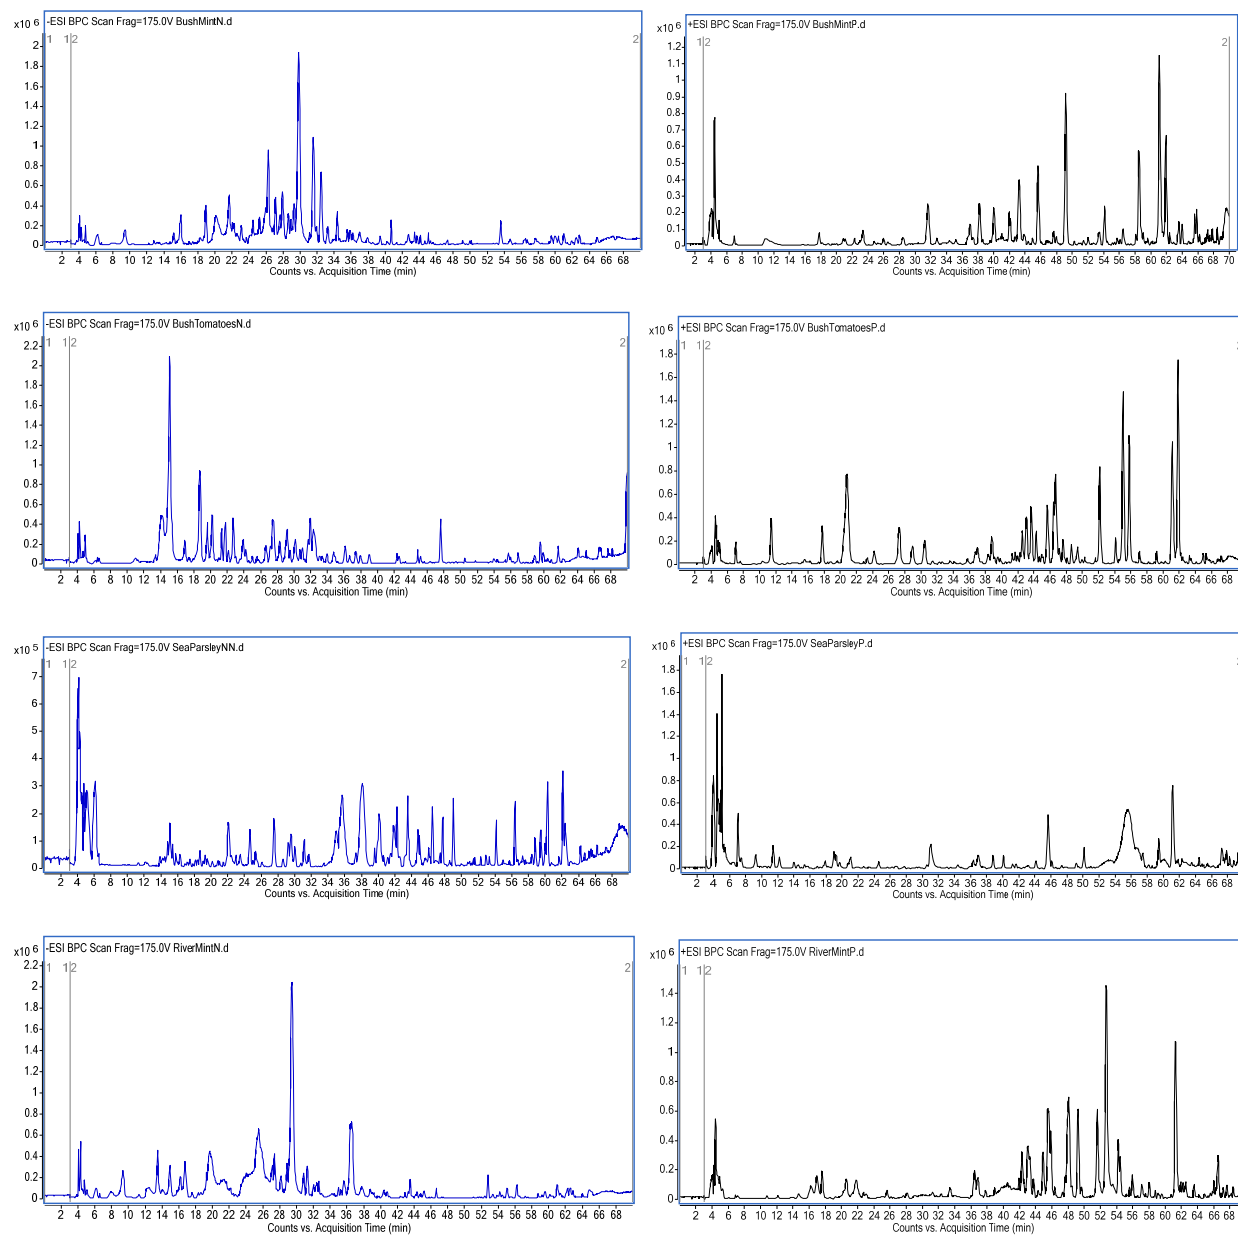

**Figure S1.** Base peak chromatograms (BPC) of bush mint, bush tomatoes, sea parsley, and river mint in positive (black color) and negative mode (blue color).

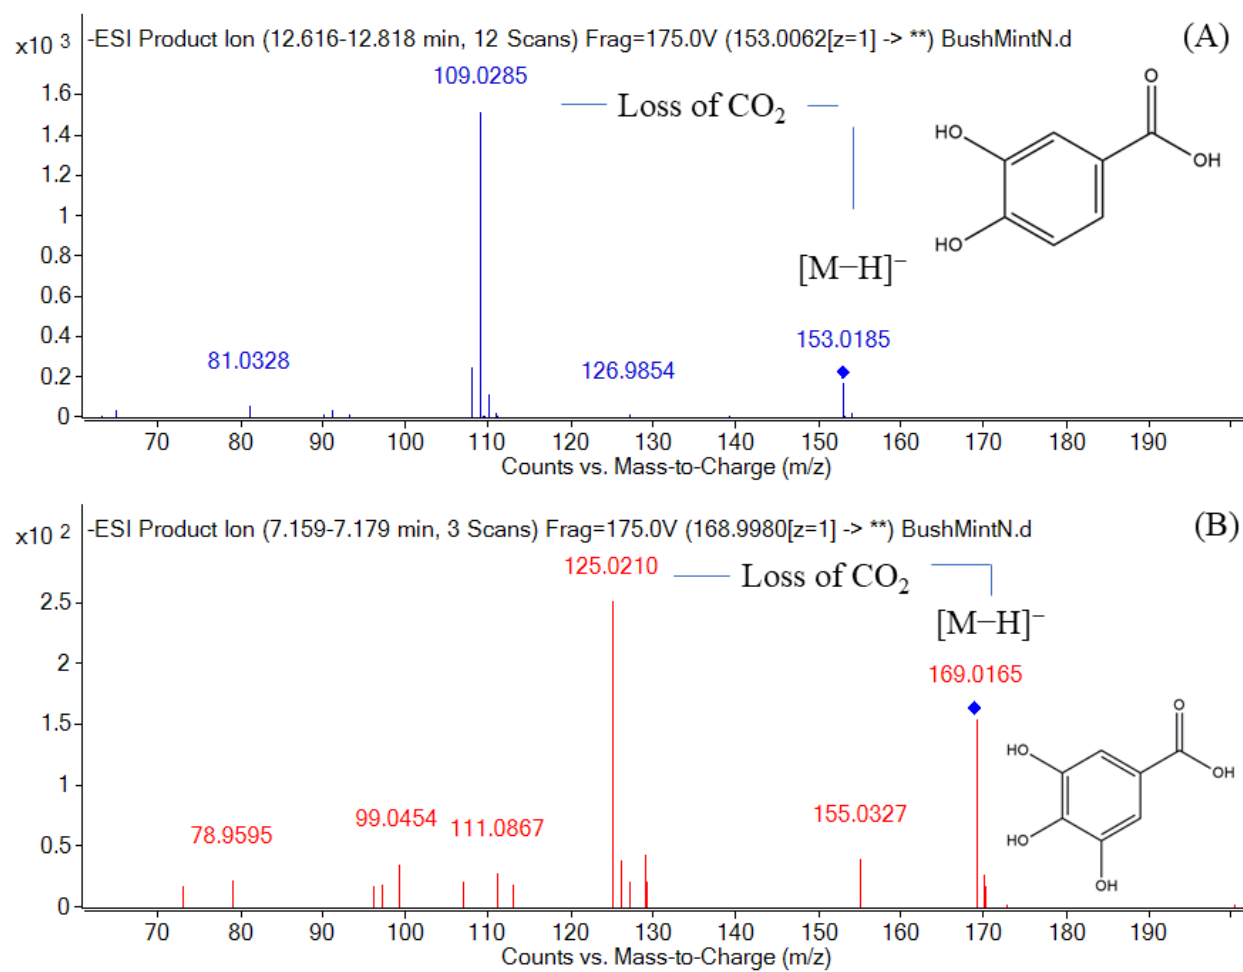

**Figure S2.** MS/MS spectra of protocatechuic acid (A) and gallic acid (B).

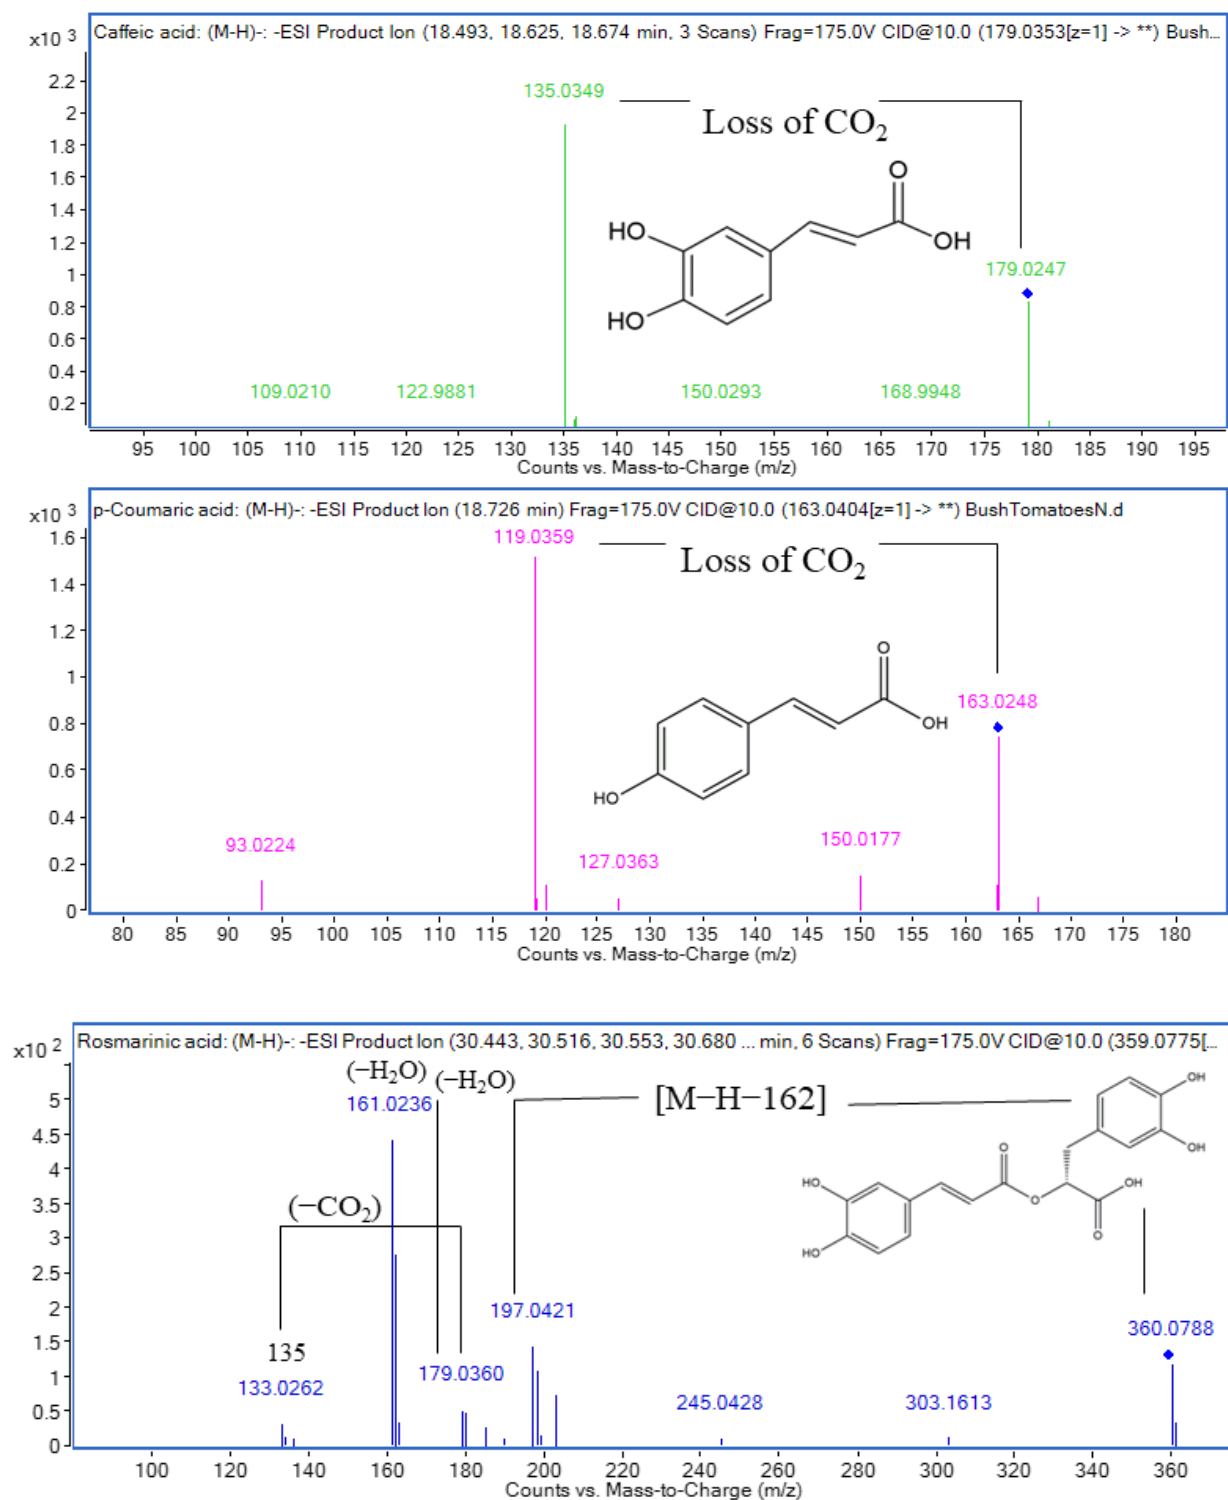

**Figure S3.** MS/MS spectra of caffeic acid, *p*-coumaric acid and rosmarinic acid.

**Table S1.** Phenolic contents in native Australian plants and fruits and their antioxidant activities

| Variables   | TPC<br>(mg GAE/g)         | TFC<br>(mg QE/g)          | DPPH<br>(mg AAE/g)        | ABTS<br>(mg AAE/g)         | FRAP<br>(mg AAE/g)        | PMA<br>(mg AAE/g)         | *OH-RSA<br>(mg AAE/g)     | FICA<br>(mg EDTA/g)      |
|-------------|---------------------------|---------------------------|---------------------------|----------------------------|---------------------------|---------------------------|---------------------------|--------------------------|
| River Mint  | 46.59 ± 1.34 <sup>b</sup> | 13.73 ± 0.32 <sup>b</sup> | 23.24 ± 1.23 <sup>b</sup> | 66.85 ± 2.75 <sup>b</sup>  | 21.45 ± 2.88 <sup>a</sup> | 13.41 ± 0.28 <sup>c</sup> | 23.62 ± 0.47 <sup>b</sup> | 3.02 ± 0.09 <sup>a</sup> |
| Bush Mint   | 57.70 ± 4.57 <sup>a</sup> | 18.81 ± 1.14 <sup>a</sup> | 28.86 ± 0.49 <sup>a</sup> | 114.44 ± 1.01 <sup>a</sup> | 23.02 ± 2.57 <sup>a</sup> | 28.01 ± 0.95 <sup>a</sup> | 43.25 ± 0.42 <sup>a</sup> | 3.26 ± 0.10 <sup>a</sup> |
| Sea Parsley | 13.44 ± 0.39 <sup>d</sup> | 8.59 ± 0.51 <sup>c</sup>  | 12.47 ± 0.35 <sup>c</sup> | 46.18 ± 0.38 <sup>c</sup>  | 5.13 ± 1.42 <sup>c</sup>  | 10.57 ± 0.18 <sup>d</sup> | 19.66 ± 0.31 <sup>c</sup> | 0.98 ± 0.10 <sup>c</sup> |
| Bush Tomato | 26.78 ± 1.00 <sup>c</sup> | 9.66 ± 0.42 <sup>c</sup>  | 24.85 ± 0.50 <sup>b</sup> | 65.73 ± 2.38 <sup>b</sup>  | 15.13 ± 0.72 <sup>b</sup> | 17.09 ± 0.38 <sup>b</sup> | 23.32 ± 0.55 <sup>b</sup> | 1.80 ± 0.10 <sup>b</sup> |

TFC – total flavonoid content, TPC – total phenolic content; Values (n=3) are presented as mean ± standard deviation per gram powder. 2,2'-diphenyl-1-picrylhydrazyl (DPPH), 2,2'-azino-bis-3-ethylbenzenothiazoline-6-sulfonic acid (ABTS), phosphomolybdate assay (PMA), reducing power assay (RPA), ferrous ion chelating assay (FICA), hydroxy-radical scavenging activity (\*OH-RSA), ethylenediaminetetraacetic acid (EDTA), ferric reducing antioxidant power (FRAP). Values with superscript letters (<sup>a-d</sup>) are significantly different from each other.

**Table S2.** LC-MS/MS quantification of phenolic compounds ( $\mu\text{g/g}$ ) from Australian native plants

| No. | Compounds                         | BM                 | RM                 | BT                 | SP                | Equation             | R2     |
|-----|-----------------------------------|--------------------|--------------------|--------------------|-------------------|----------------------|--------|
| 1   | Rosmarinic Acid *                 | 945.56 $\pm$ 43.50 | 745.67 $\pm$ 25.02 | 76.57 $\pm$ 4.98   | 23.43 $\pm$ 1.01  | Y = 12943.4x – 76492 | 0.9999 |
| 2   | 3- <i>p</i> -Coumaroylquinic acid |                    |                    |                    | 9.24 $\pm$ 0.08   | Y = 9657.4x – 40528  | 0.9999 |
| 3   | 3-Sinapoylquinic acid             | 107.34 $\pm$ 4.98  | 114.73 $\pm$ 2.41  | 102.26 $\pm$ 5.06  | 8.93 $\pm$ 0.30   | Y = 9657.4x – 40528  | 0.9999 |
| 4   | 5-Feruloylquinic acid             | 80.20 $\pm$ 5.11   |                    |                    |                   | Y = 9657.4x – 40528  | 0.9999 |
| 5   | <i>p</i> -Coumaric acid *         | 350.60 $\pm$ 8.59  | 30.96 $\pm$ 0.24   | 32.97 $\pm$ 0.23   | 30.63 $\pm$ 0.12  | Y = 349225x + 507406 | 0.9932 |
| 6   | <i>p</i> -Hydroxybenzoic acid *   | 224.80 $\pm$ 15.83 |                    |                    | 73.39 $\pm$ 15.95 | Y = 63189x + 94570   | 0.9959 |
| 7   | Gallic Acid *                     | 70.48 $\pm$ 0.99   |                    | 72.14 $\pm$ 1.50   | 7.09 $\pm$ 0.06   | Y = 4E+06x – 127884  | 0.9959 |
| 8   | Benzoic acid                      |                    |                    | 95.31 $\pm$ 2.54   | 24.07 $\pm$ 2.27  | Y = 4E+06x – 127884  | 0.9959 |
| 9   | Caffeic acid *                    | 167.43 $\pm$ 21.93 | 556.80 $\pm$ 29.28 | 11.66 $\pm$ 0.58   | 141.25 $\pm$ 5.11 | Y = 6E+06x + 212752  | 0.9948 |
| 10  | Caftaric acid                     |                    |                    | 62.34 $\pm$ 0.91   |                   | Y = 9657.4x – 40528  | 0.9999 |
| 11  | Chicoric acid                     |                    | 9.87 $\pm$ 0.41    | 74.03 $\pm$ 2.25   |                   | Y = 9657.4x – 40528  | 0.9999 |
| 12  | Chlorogenic acid *                | 584.07 $\pm$ 12.39 | 238.76 $\pm$ 14.99 | 747.52 $\pm$ 67.48 | 29.07 $\pm$ 0.98  | Y = 9657.4x – 40528  | 0.9999 |
| 13  | Cinnamic acid *                   | 36.87 $\pm$ 3.20   | 22.40 $\pm$ 1.68   | 125.13 $\pm$ 13.81 |                   | Y = 43521.7 – 32873  | 0.9941 |
| 14  | Quinic acid                       | 114.77 $\pm$ 12.51 | 284.52 $\pm$ 19.99 | 136.03 $\pm$ 13.73 | 28.22 $\pm$ 0.74  | Y = 4E+06x – 127884  | 0.9959 |
| 15  | Vanillic acid                     | 118.19 $\pm$ 12.39 |                    | 88.75 $\pm$ 2.53   | 70.49 $\pm$ 0.85  | Y = 4E+06x – 127884  | 0.9959 |
| 16  | Protocatechuic acid *             | 102.08 $\pm$ 15.47 | 35.47 $\pm$ 0.98   | 178.70 $\pm$ 19.34 | 43.57 $\pm$ 1.63  | Y = 3E+06x – 48851   | 0.9998 |
| 17  | Ferulic acid *                    | 91.31 $\pm$ 2.56   | 30.77 $\pm$ 3.36   |                    | 15.92 $\pm$ 0.38  | Y = 91532x + 15195   | 0.9950 |
|     | Total phenolic acids              | 2993.7             | 2069.95            | 1803.41            | 505.3             |                      |        |
| 18  | Diosmetin                         | 65.61 $\pm$ 2.04   |                    |                    |                   | Y = 4E+06x – 72736   | 0.9987 |
| 19  | Diosmin                           | 45.17 $\pm$ 2.96   | 14.04 $\pm$ 0.47   | 71.46 $\pm$ 5.57   | 10.64 $\pm$ 0.46  | Y = 4E+06x – 72736   | 0.9987 |
| 20  | Epicatechin *                     | 39.90 $\pm$ 1.26   |                    | 38.03 $\pm$ 0.19   |                   | Y = 4E+06x – 72736   | 0.9987 |
| 21  | Epicatechin gallate *             | 67.79 $\pm$ 3.33   |                    |                    |                   | Y = 3E+06x – 78678   | 0.9995 |
| 22  | Kaempferol-3-glucoside *          | 309.74 $\pm$ 50.04 |                    |                    | 2.59 $\pm$ 0.18   | Y = 2E+06x – 11882   | 0.9979 |
| 23  | Kaempferol *                      | 64.16 $\pm$ 5.03   |                    |                    | 12.48 $\pm$ 0.58  | Y = 6E+06x – 19736   | 0.9997 |
| 24  | Acacetin                          | 138.37 $\pm$ 22.49 |                    |                    |                   | Y = 4E+06x – 72736   | 0.9987 |
| 25  | Luteolin                          | 98.36 $\pm$ 1.73   |                    |                    |                   | Y = 4E+06x – 72736   | 0.9987 |
| 26  | Procyanidin B2                    |                    | 37.97 $\pm$ 4.10   | 44.15 $\pm$ 2.87   |                   | Y = 1E+06x – 38339   | 0.9989 |
|     | Total Flavonoids                  | 829.1              | 52.01              | 153.64             | 25.71             |                      |        |
| 27  | Polydatin *                       | 39.67 $\pm$ 1.12   |                    | 32.44 $\pm$ 1.87   |                   | Y = 535152x – 15101  | 0.9952 |
| 28  | Resveratrol *                     | 116.03 $\pm$ 4.09  |                    | 135.25 $\pm$ 5.05  |                   | Y = 97707x – 476400  | 0.9974 |
| 29  | Rosmanol                          |                    |                    | 56.45 $\pm$ 4.88   |                   | Y = 535152x – 15101  | 0.9952 |
| 30  | Sagerinic acid                    | 690.71 $\pm$ 61.64 |                    |                    |                   | Y = 535152x – 15101  | 0.9952 |
| 31  | Scopoletin                        | 25.98 $\pm$ 2.51   | 13.22 $\pm$ 0.99   | 167.36 $\pm$ 21.07 | 51.55 $\pm$ 38.13 | Y = 535152x – 15101  | 0.9952 |
| 32  | Umbelliferone                     | 112.63 $\pm$ 24.94 |                    |                    |                   | Y = 535152x – 15101  | 0.9952 |

|                         |                  |              |              |              |              |                     |        |
|-------------------------|------------------|--------------|--------------|--------------|--------------|---------------------|--------|
| 33                      | 3-Methylcoumarin | 74.52 ± 1.25 |              | 36.68 ± 2.18 |              | Y = 535152x – 15101 | 0.9952 |
| 34                      | Carnosic acid    | 72.29 ± 2.92 | 47.05 ± 3.27 |              | 9.54 ± 0.40  | Y = 535152x – 15101 | 0.9952 |
| 35                      | Carnosol         | 82.25 ± 3.65 | 10.33 ± 0.33 |              |              | Y = 535152x – 15101 | 0.9952 |
| 36                      | Coumarin         | 13.43 ± 0.97 | 10.49 ± 0.36 |              |              | Y = 535152x – 15101 | 0.9952 |
| 37                      | Pyrogallol *     |              | 10.56 ± 0.45 | 17.93 ± 0.77 | 19.16 ± 0.47 | Y = 53521.9 – 31891 | 0.9714 |
| Total other polyphenols |                  | 1227.51      | 91.65        | 446.11       | 80.25        |                     |        |

BM; Bush mint, RM; River mint, BT; Bush tomatoes, RM; River mint; compounds with asterisk (\*) were used to generate equations.

**Table S3.** Predicted absorption and distribution of selected compounds.

| No. | Compounds                         | Absorption       |                    |                               |                   |               |                 | Distribution     |              |                          |                  |                  |
|-----|-----------------------------------|------------------|--------------------|-------------------------------|-------------------|---------------|-----------------|------------------|--------------|--------------------------|------------------|------------------|
|     |                                   | Water solubility | Caco2 permeability | Intestinal absorption (human) | Skin Permeability | P-g substrate | P-g I inhibitor | P-g II inhibitor | VDss (human) | Fraction unbound (human) | BBB permeability | CNS permeability |
| 1   | 3- <i>p</i> -Coumaroylquinic acid | -1.99            | -0.66              | 43.93                         | -2.74             | Yes           | No              | No               | 0.03         | 0.61                     | -1.16            | -3.69            |
| 2   | 3-Sinapoylquinic acid             | -2.55            | -0.61              | 39.65                         | -2.74             | Yes           | No              | No               | -1.13        | 0.46                     | -1.40            | -4.02            |
| 3   | Caffeic acid                      | -2.33            | 0.63               | 69.41                         | -2.72             | No            | No              | No               | -1.10        | 0.53                     | -0.65            | -2.61            |
| 4   | Chlorogenic acid                  | -2.45            | -0.84              | 36.38                         | -2.74             | Yes           | No              | No               | 0.58         | 0.66                     | -1.41            | -3.86            |
| 5   | Cinnamic acid                     | -2.61            | 1.72               | 94.83                         | -2.70             | No            | No              | No               | -1.05        | 0.38                     | 0.45             | -1.83            |
| 6   | Ferulic acid                      | -2.82            | 0.18               | 93.69                         | -2.72             | No            | No              | No               | -1.37        | 0.34                     | -0.24            | -2.61            |
| 7   | Gallic Acid                       | -2.56            | -0.08              | 43.37                         | -2.74             | No            | No              | No               | -1.86        | 0.62                     | -1.10            | -3.74            |
| 8   | <i>p</i> -Coumaric acid           | -2.38            | 1.21               | 93.49                         | -2.72             | No            | No              | No               | -1.15        | 0.43                     | -0.23            | -2.42            |
| 9   | <i>p</i> -Hydroxybenzoic acid     | -1.88            | 1.15               | 83.96                         | -2.72             | No            | No              | No               | -1.56        | 0.59                     | -0.33            | -3.21            |
| 10  | Protocatechuic acid               | -2.07            | 0.49               | 71.17                         | -2.73             | No            | No              | No               | -1.30        | 0.65                     | -0.68            | -3.31            |
| 11  | Quinic acid                       | -1.12            | -0.26              | 32.27                         | -2.74             | No            | No              | No               | -0.22        | 0.82                     | -0.89            | -3.67            |
| 12  | Sinapic acid                      | -2.87            | 0.27               | 93.06                         | -2.73             | Yes           | No              | No               | -1.11        | 0.45                     | -0.25            | -2.66            |
| 13  | Syringic acid                     | -2.22            | 0.50               | 73.08                         | -2.74             | Yes           | No              | No               | -1.44        | 0.60                     | -0.19            | -2.70            |
| 14  | Rosmarinic acid                   | -3.06            | -0.94              | 32.52                         | -2.74             | Yes           | No              | No               | 0.39         | 0.35                     | -1.38            | -3.35            |
| 15  | Chicoric acid                     | -2.88            | -0.96              | 8.17                          | -2.74             | Yes           | No              | No               | 0.03         | 0.26                     | -1.81            | -3.86            |
| 16  | Caftaric acid                     | -2.54            | -0.80              | 9.40                          | -2.74             | No            | No              | No               | -0.92        | 0.47                     | -1.23            | -3.93            |
| 17  | Benzoic acid                      | -1.74            | 1.71               | 100.00                        | -2.73             | No            | No              | No               | -1.64        | 0.52                     | -0.22            | -2.00            |
| 18  | Vanillic acid                     | -1.84            | 0.33               | 78.15                         | -2.73             | No            | No              | No               | -1.74        | 0.52                     | -0.38            | -2.63            |
| 19  | 5-Feruloylquinic acid             | -2.55            | -0.56              | 44.76                         | -2.74             | Yes           | No              | No               | -1.30        | 0.39                     | -1.27            | -3.94            |
| 20  | Diosmin                           | -2.93            | 0.31               | 29.32                         | -2.74             | Yes           | No              | No               | 1.43         | 0.11                     | -1.80            | -4.84            |
| 21  | Epicatechin                       | -3.12            | -0.28              | 68.83                         | -2.74             | Yes           | No              | No               | 1.03         | 0.24                     | -1.05            | -3.30            |
| 22  | Isorhamnetin                      | -3.00            | 0.00               | 76.01                         | -2.74             | Yes           | No              | No               | 1.12         | 0.09                     | -1.14            | -3.19            |
| 23  | Kaempferol                        | -3.04            | 0.03               | 74.29                         | -2.74             | Yes           | No              | No               | 1.27         | 0.18                     | -0.94            | -2.23            |
| 24  | Luteolin                          | -3.09            | 0.10               | 81.13                         | -2.74             | Yes           | No              | No               | 1.15         | 0.17                     | -0.91            | -2.25            |
| 25  | Myricetin                         | -2.92            | 0.10               | 65.93                         | -2.74             | Yes           | No              | No               | 1.32         | 0.24                     | -1.49            | -3.71            |
| 26  | Procyanidin B2                    | -2.89            | -1.23              | 66.75                         | -2.74             | Yes           | Yes             | Yes              | -0.16        | 0.31                     | -1.94            | -3.98            |
| 27  | Quercetin                         | -2.93            | -0.23              | 77.21                         | -2.74             | Yes           | No              | No               | 1.56         | 0.21                     | -1.10            | -3.07            |
| 28  | Quercetin-3-glucoside             | -2.93            | 0.24               | 48.00                         | -2.74             | Yes           | No              | No               | 1.85         | 0.23                     | -1.69            | -4.09            |
| 29  | Taxifolin                         | -3.04            | 0.92               | 64.71                         | -2.74             | Yes           | No              | No               | 1.64         | 0.32                     | -0.73            | -3.20            |
| 30  | Rutin                             | -2.89            | -0.95              | 23.45                         | -2.74             | Yes           | No              | No               | 1.66         | 0.19                     | -1.90            | -5.18            |
| 31  | Diosmetin                         | -3.24            | 0.33               | 79.90                         | -2.74             | Yes           | No              | No               | 0.71         | 0.07                     | -0.95            | -2.32            |

|    |                        |       |       |       |       |     |     |    |       |      |       |       |
|----|------------------------|-------|-------|-------|-------|-----|-----|----|-------|------|-------|-------|
| 32 | Kaempferol-3-glucoside | -2.86 | 0.31  | 48.05 | -2.74 | Yes | No  | No | 1.44  | 0.22 | -1.51 | -3.91 |
| 33 | Acacetin               | -3.28 | 1.14  | 94.32 | -2.74 | Yes | No  | No | 0.35  | 0.08 | -0.20 | -2.16 |
| 34 | Coumarin               | -1.52 | 1.65  | 97.34 | -1.92 | No  | No  | No | -0.14 | 0.37 | -0.01 | -1.93 |
| 35 | Pyrogallol             | -1.41 | 1.12  | 83.55 | -2.75 | No  | No  | No | 0.13  | 0.71 | -0.44 | -3.25 |
| 36 | Resveratrol            | -3.18 | 1.17  | 90.94 | -2.74 | Yes | No  | No | 0.30  | 0.17 | -0.05 | -2.07 |
| 37 | Umbelliferone          | -2.13 | 1.21  | 94.55 | -2.60 | No  | No  | No | 0.03  | 0.43 | -0.28 | -2.74 |
| 38 | Carnosol               | -4.12 | 0.57  | 91.21 | -2.89 | Yes | Yes | No | 0.82  | 0.04 | -0.10 | -1.82 |
| 39 | Carnosic acid          | -3.22 | 0.80  | 99.03 | -2.74 | No  | No  | No | -1.03 | 0.05 | -0.55 | -2.00 |
| 40 | Rosmanol               | -3.61 | 1.02  | 93.41 | -2.77 | Yes | Yes | No | 0.65  | 0.11 | -0.58 | -2.10 |
| 41 | Sagerinic acid         | -2.89 | -1.69 | 2.09  | -2.74 | Yes | No  | No | 0.04  | 0.27 | -2.56 | -4.49 |
| 42 | 3-Methylcoumarin       | -1.94 | 1.65  | 97.26 | -1.81 | Yes | No  | No | -0.05 | 0.30 | 0.00  | -1.89 |
| 43 | Polydatin              | -2.58 | -0.08 | 51.09 | -2.74 | Yes | Yes | No | 0.13  | 0.27 | -1.03 | -3.61 |
| 44 | Scopoletin             | -2.50 | 1.18  | 95.28 | -2.94 | No  | No  | No | 0.03  | 0.36 | -0.30 | -2.32 |

Intestinal absorption (human) (IA), P-glycoprotein substrate, P-glycoprotein I inhibitor, P-glycoprotein II inhibitor, Water solubility (log mol/L) (WS), Volume of distributions (VDss); blood-brain barrier (BBB); central nervous system (CNS)

**Interpretation of results:** If the Caco2 permeability value is higher than 0.90, a compound has a high Caco-2 permeability. A compound with a value of less than 30% is poorly absorbed in the human intestinal. If a compound has a value less than -2.5 is considered to have a low skin permeability. The compounds with values < -3 cannot penetrate the central nervous system, while values > -2 are considered to penetrate the central nervous system. The compounds with values logBB < -1 are poorly distributed to the brain while values logBB > 0.3 are considered to cross the blood-brain barrier readily. VDss is considered low if below 0.71 L/kg (log VDss < -0.15) and high if above 2.81 L/kg (log VDss > 0.45).



**Table S4.** Pharmacokinetics properties of selected compounds

| No. | Molecule                          | GI absorption | BBB permeant | P-gp substrate | CYP1A2 inhibitor | CYP2C19 inhibitor | CYP2C9 inhibitor | CYP2D6 inhibitor | CYP3A4 inhibitor | log Kp (cm/s) skin permeation |
|-----|-----------------------------------|---------------|--------------|----------------|------------------|-------------------|------------------|------------------|------------------|-------------------------------|
| 1   | 3- <i>p</i> -Coumaroylquinic acid | Low           | No           | No             | No               | No                | No               | No               | No               | -8.41                         |
| 2   | 3-Sinapoylquinic acid             | Low           | No           | Yes            | No               | No                | No               | No               | No               | -8.82                         |
| 3   | Caffeic acid                      | High          | No           | No             | No               | No                | No               | No               | No               | -6.58                         |
| 4   | Chlorogenic acid                  | Low           | No           | No             | No               | No                | No               | No               | No               | -8.76                         |
| 5   | Cinnamic acid                     | High          | Yes          | No             | No               | No                | No               | No               | No               | -5.69                         |
| 6   | Ferulic acid                      | High          | Yes          | No             | No               | No                | No               | No               | No               | -6.41                         |
| 7   | Gallic Acid                       | High          | No           | No             | No               | No                | No               | No               | Yes              | -6.84                         |
| 8   | <i>p</i> -Coumaric acid           | High          | Yes          | No             | No               | No                | No               | No               | No               | -6.26                         |
| 9   | <i>p</i> -Hydroxybenzoic acid     | High          | Yes          | No             | No               | No                | No               | No               | No               | -6.02                         |
| 10  | Protocatechuic acid               | High          | No           | No             | No               | No                | No               | No               | Yes              | -6.42                         |
| 11  | Quinic acid                       | Low           | No           | Yes            | No               | No                | No               | No               | No               | -9.15                         |
| 12  | Sinapic acid                      | High          | No           | No             | No               | No                | No               | No               | No               | -6.63                         |
| 13  | Syringic acid                     | High          | No           | No             | No               | No                | No               | No               | No               | -6.77                         |
| 14  | Rosmarinic acid                   | Low           | No           | No             | No               | No                | No               | No               | No               | -6.82                         |
| 15  | Chicoric acid                     | Low           | No           | Yes            | No               | No                | No               | No               | No               | -7.77                         |
| 16  | Caftaric acid                     | Low           | No           | No             | No               | No                | No               | No               | No               | -8.16                         |
| 17  | Benzoic acid                      | High          | Yes          | No             | No               | No                | No               | No               | No               | -5.72                         |
| 18  | Vanillic acid                     | High          | No           | No             | No               | No                | No               | No               | No               | -6.31                         |
| 19  | 5-Feruloylquinic acid             | Low           | No           | No             | No               | No                | No               | No               | No               | -8.62                         |
| 20  | Diosmin                           | Low           | No           | Yes            | No               | No                | No               | No               | No               | -9.91                         |
| 21  | Epicatechin                       | High          | No           | Yes            | No               | No                | No               | No               | No               | -7.82                         |
| 22  | Isorhamnetin                      | High          | No           | No             | Yes              | No                | No               | Yes              | Yes              | -6.9                          |
| 23  | Kaempferol                        | High          | No           | No             | Yes              | No                | No               | Yes              | Yes              | -6.7                          |
| 24  | Luteolin                          | High          | No           | No             | Yes              | No                | No               | Yes              | Yes              | -6.25                         |
| 25  | Myricetin                         | Low           | No           | No             | Yes              | No                | No               | No               | Yes              | -7.4                          |
| 26  | Procyanidin B2                    | Low           | No           | No             | No               | No                | No               | No               | Yes              | -8.15                         |
| 27  | Quercetin                         | High          | No           | No             | Yes              | No                | No               | Yes              | Yes              | -7.05                         |
| 28  | Quercetin-3-glucoside             | Low           | No           | No             | No               | No                | No               | No               | No               | -8.88                         |
| 29  | Taxifolin                         | High          | No           | No             | No               | No                | No               | No               | No               | -7.48                         |
| 30  | Rutin                             | Low           | No           | Yes            | No               | No                | No               | No               | No               | -10.26                        |
| 31  | Diosmetin                         | High          | No           | No             | Yes              | No                | Yes              | Yes              | Yes              | -5.93                         |
| 32  | Kaempferol-3-glucoside            | Low           | No           | No             | No               | No                | No               | No               | No               | -8.52                         |
| 33  | Acacetin                          | High          | No           | No             | Yes              | No                | Yes              | Yes              | Yes              | -5.66                         |
| 34  | Coumarin                          | High          | Yes          | No             | Yes              | No                | No               | No               | No               | -6.2                          |
| 35  | Pyrogallol                        | High          | Yes          | No             | No               | No                | No               | No               | Yes              | -6.7                          |
| 36  | Resveratrol                       | High          | Yes          | No             | Yes              | No                | Yes              | No               | Yes              | -5.47                         |

|    |                  |      |     |     |     |    |     |     |    |       |
|----|------------------|------|-----|-----|-----|----|-----|-----|----|-------|
| 37 | Umbelliferone    | High | Yes | No  | Yes | No | No  | No  | No | -6.17 |
| 38 | Carnosol         | High | Yes | Yes | No  | No | Yes | No  | No | -5.21 |
| 39 | Carnosic acid    | High | No  | No  | No  | No | Yes | No  | No | -4.86 |
| 40 | Rosmanol         | High | No  | Yes | No  | No | No  | Yes | No | -5.99 |
| 41 | Sagerinic acid   | Low  | No  | No  | No  | No | No  | No  | No | -8.18 |
| 42 | 3-Methylcoumarin | High | Yes | No  | Yes | No | No  | No  | No | -5.66 |
| 43 | Polydatin        | High | No  | Yes | No  | No | No  | No  | No | -7.95 |
| 44 | Scopoletin       | High | Yes | No  | Yes | No | No  | No  | No | -6.39 |

---

**Table S5.** Radar bioavailability properties of selected compounds

| No. | Compounds                | MW     | Rotatable bonds | XLOGP3 | TPSA   | WLOGP | ESOL Log S | Fraction Csp3 | Lipinski violations | Bioavailability Score |
|-----|--------------------------|--------|-----------------|--------|--------|-------|------------|---------------|---------------------|-----------------------|
| 1   | 3-p-Coumaroylquinic acid | 338.31 | 5               | -0.07  | 144.52 | -0.46 | -1.75      | 0.38          | 0                   | 0.56                  |
| 2   | 3-Sinapoylquinic acid    | 398.36 | 7               | -0.13  | 162.98 | -0.44 | -1.92      | 0.44          | 0                   | 0.11                  |
| 3   | Caffeic acid             | 180.16 | 2               | 1.15   | 77.76  | 1.09  | -1.89      | 0.00          | 0                   | 0.56                  |
| 4   | Chlorogenic acid         | 354.31 | 5               | -0.42  | 164.75 | -0.75 | -1.62      | 0.38          | 1                   | 0.11                  |
| 5   | Cinnamic acid            | 148.16 | 2               | 2.13   | 37.30  | 1.68  | -2.37      | 0.00          | 0                   | 0.85                  |
| 6   | Ferulic acid             | 194.18 | 3               | 1.51   | 66.76  | 1.39  | -2.11      | 0.10          | 0                   | 0.85                  |
| 7   | Gallic Acid              | 170.12 | 1               | 0.70   | 97.99  | 0.50  | -1.64      | 0.00          | 0                   | 0.56                  |
| 8   | p-Coumaric acid          | 164.16 | 2               | 1.46   | 57.53  | 1.38  | -2.02      | 0.00          | 0                   | 0.85                  |
| 9   | p-Hydroxybenzoic acid    | 138.12 | 1               | 1.58   | 57.53  | 1.09  | -2.07      | 0.00          | 0                   | 0.85                  |
| 10  | Protocatechuic acid      | 154.12 | 1               | 1.15   | 77.76  | 0.80  | -1.86      | 0.00          | 0                   | 0.56                  |
| 11  | Quinic acid              | 192.17 | 1               | -2.37  | 118.22 | -2.32 | 0.53       | 0.86          | 0                   | 0.56                  |
| 12  | Sinapic acid             | 224.21 | 4               | 1.46   | 75.99  | 1.40  | -2.16      | 0.18          | 0                   | 0.56                  |
| 13  | Syringic acid            | 198.17 | 3               | 1.04   | 75.99  | 1.11  | -1.84      | 0.22          | 0                   | 0.56                  |
| 14  | Rosmarinic acid          | 360.31 | 7               | 2.36   | 144.52 | 1.65  | -3.44      | 0.11          | 0                   | 0.56                  |
| 15  | Chicoric acid            | 474.37 | 11              | 2.01   | 208.12 | 1.01  | -3.58      | 0.09          | 2                   | 0.11                  |
| 16  | Caftaric acid            | 312.23 | 7               | 0.06   | 161.59 | -0.56 | -1.55      | 0.15          | 0                   | 0.11                  |
| 17  | Benzoic acid             | 122.12 | 1               | 1.87   | 37.30  | 1.38  | -2.20      | 0.00          | 0                   | 0.85                  |
| 18  | Vanillic acid            | 168.15 | 2               | 1.43   | 66.76  | 1.10  | -2.02      | 0.12          | 0                   | 0.85                  |
| 19  | 5-Feruloylquinic acid    | 368.34 | 6               | -0.10  | 153.75 | -0.45 | -1.84      | 0.41          | 0                   | 0.11                  |
| 20  | Diosmin                  | 608.54 | 7               | 0.14   | 238.20 | -1.09 | -3.51      | 0.46          | 3                   | 0.17                  |
| 21  | Epicatechin              | 290.27 | 1               | 0.36   | 110.38 | 1.22  | -2.22      | 0.20          | 0                   | 0.55                  |
| 22  | Isorhamnetin             | 316.26 | 2               | 1.87   | 120.36 | 2.29  | -3.36      | 0.06          | 0                   | 0.55                  |
| 23  | Kaempferol               | 286.24 | 1               | 1.90   | 111.13 | 2.28  | -3.31      | 0.00          | 0                   | 0.55                  |
| 24  | Luteolin                 | 286.24 | 1               | 2.53   | 111.13 | 2.28  | -3.71      | 0.00          | 0                   | 0.55                  |
| 25  | Myricetin                | 318.24 | 1               | 1.18   | 151.59 | 1.69  | -3.01      | 0.00          | 1                   | 0.55                  |
| 26  | Procyanidin B2           | 578.52 | 3               | 2.37   | 220.76 | 2.35  | -5.14      | 0.20          | 3                   | 0.17                  |
| 27  | Quercetin                | 302.24 | 1               | 1.54   | 131.36 | 1.99  | -3.16      | 0.00          | 0                   | 0.55                  |
| 28  | Quercetin-3-glucoside    | 464.38 | 4               | 0.36   | 210.51 | -0.54 | -3.04      | 0.29          | 2                   | 0.17                  |
| 29  | Taxifolin                | 304.25 | 1               | 0.95   | 127.45 | 0.86  | -2.66      | 0.13          | 0                   | 0.55                  |

|    |                        |        |    |       |        |       |       |      |   |      |
|----|------------------------|--------|----|-------|--------|-------|-------|------|---|------|
| 30 | Rutin                  | 610.52 | 6  | -0.33 | 269.43 | -1.69 | -3.30 | 0.44 | 3 | 0.17 |
| 31 | Diosmetin              | 300.26 | 2  | 3.10  | 100.13 | 2.59  | -4.06 | 0.06 | 0 | 0.55 |
| 32 | Kaempferol-3-glucoside | 448.38 | 4  | 0.72  | 190.28 | -0.24 | -3.18 | 0.29 | 2 | 0.17 |
| 33 | Acacetin               | 284.26 | 2  | 3.35  | 79.90  | 2.88  | -4.14 | 0.06 | 0 | 0.55 |
| 34 | Coumarin               | 146.14 | 0  | 1.39  | 30.21  | 1.79  | -2.29 | 0.00 | 0 | 0.55 |
| 35 | Pyrogallol             | 126.11 | 0  | 0.52  | 60.69  | 0.80  | -1.44 | 0.00 | 0 | 0.55 |
| 36 | Resveratrol            | 228.24 | 2  | 3.13  | 60.69  | 2.76  | -3.62 | 0.00 | 0 | 0.55 |
| 37 | Umbelliferone          | 162.14 | 0  | 1.58  | 50.44  | 1.50  | -2.46 | 0.00 | 0 | 0.55 |
| 38 | Carnosol               | 330.42 | 1  | 4.38  | 66.76  | 3.96  | -4.77 | 0.65 | 0 | 0.55 |
| 39 | Carnosic acid          | 332.43 | 2  | 4.89  | 77.76  | 4.32  | -5.03 | 0.65 | 0 | 0.56 |
| 40 | Rosmanol               | 346.42 | 1  | 3.41  | 86.99  | 2.93  | -4.25 | 0.65 | 0 | 0.55 |
| 41 | Sagerinic acid         | 720.63 | 14 | 3.54  | 289.04 | 2.92  | -5.96 | 0.22 | 3 | 0.11 |
| 42 | 3-Methylcoumarin       | 160.17 | 0  | 2.28  | 30.21  | 2.10  | -2.89 | 0.10 | 0 | 0.55 |
| 43 | Polydatin              | 390.38 | 5  | 1.03  | 139.84 | 0.23  | -2.90 | 0.30 | 1 | 0.55 |
| 44 | Scopoletin             | 192.17 | 1  | 1.53  | 59.67  | 1.51  | -2.46 | 0.10 | 0 | 0.55 |

(Lipophilicity: XLOGP3 between -0.7 and +5.0, size: MW between 150 and 500 g/mol, polarity: TPSA between 20 and 130Å, solubility: log S not higher than 6, saturation: fraction of carbons in the sp<sup>3</sup> hybridization not less than 0.25, and flexibility: no more than nine rotatable bonds; topological polar surface area (TPSA)

**Table S6.** Predicted metabolism and excretion of selected compounds.

| No. | Compounds                         | Metabolism       |                  |                  |                   |                  |                  |                  | Excretion       |                      |
|-----|-----------------------------------|------------------|------------------|------------------|-------------------|------------------|------------------|------------------|-----------------|----------------------|
|     |                                   | CYP2D6 substrate | CYP3A4 substrate | CYP1A2 inhibitor | CYP2C19 inhibitor | CYP2C9 inhibitor | CYP2D6 inhibitor | CYP3A4 inhibitor | Total Clearance | Renal OCT2 substrate |
| 1   | 3- <i>p</i> -Coumaroylquinic acid | No               | No               | No               | No                | No               | No               | No               | 0.45            | No                   |
| 2   | 3-Sinapoylquinic acid             | No               | No               | No               | No                | No               | No               | No               | 0.73            | No                   |
| 3   | Caffeic acid                      | No               | No               | No               | No                | No               | No               | No               | 0.51            | No                   |
| 4   | Chlorogenic acid                  | No               | No               | No               | No                | No               | No               | No               | 0.31            | No                   |
| 5   | Cinnamic acid                     | No               | No               | No               | No                | No               | No               | No               | 0.78            | No                   |
| 6   | Ferulic acid                      | No               | No               | No               | No                | No               | No               | No               | 0.62            | No                   |
| 7   | Gallic Acid                       | No               | No               | No               | No                | No               | No               | No               | 0.52            | No                   |
| 8   | <i>p</i> -Coumaric acid           | No               | No               | No               | No                | No               | No               | No               | 0.66            | No                   |
| 9   | <i>p</i> -Hydroxybenzoic acid     | No               | No               | No               | No                | No               | No               | No               | 0.59            | No                   |
| 10  | Protocatechuic acid               | No               | No               | No               | No                | No               | No               | No               | 0.55            | No                   |
| 11  | Quinic acid                       | No               | No               | No               | No                | No               | No               | No               | 0.64            | No                   |
| 12  | Sinapic acid                      | No               | No               | No               | No                | No               | No               | No               | 0.72            | No                   |
| 13  | Syringic acid                     | No               | No               | No               | No                | No               | No               | No               | 0.65            | No                   |
| 14  | Rosmarinic acid                   | No               | No               | No               | No                | No               | No               | No               | 0.25            | No                   |
| 15  | Chicoric acid                     | No               | No               | No               | No                | No               | No               | No               | 0.06            | No                   |
| 16  | Caftaric acid                     | No               | No               | No               | No                | No               | No               | No               | 0.45            | No                   |
| 17  | benzoic acid                      | No               | No               | No               | No                | No               | No               | No               | 0.71            | No                   |
| 18  | Vanillic acid                     | No               | No               | No               | No                | No               | No               | No               | 0.63            | No                   |
| 19  | 5-Feruloylquinic acid             | No               | No               | No               | No                | No               | No               | No               | 0.39            | No                   |
| 20  | Diosmin                           | No               | No               | No               | No                | No               | No               | No               | -0.11           | No                   |
| 21  | Epicatechin                       | No               | No               | No               | No                | No               | No               | No               | 0.18            | No                   |
| 22  | Isorhamnetin                      | No               | No               | Yes              | No                | No               | No               | No               | 0.51            | No                   |
| 23  | Kaempferol                        | No               | No               | Yes              | No                | No               | No               | No               | 0.48            | No                   |
| 24  | Luteolin                          | No               | No               | Yes              | No                | Yes              | No               | No               | 0.50            | No                   |
| 25  | Myricetin                         | No               | No               | Yes              | No                | No               | No               | No               | 0.42            | No                   |
| 26  | Procyanidin B2                    | No               | No               | No               | No                | No               | No               | No               | -0.09           | Yes                  |
| 27  | Quercetin                         | No               | No               | Yes              | No                | No               | No               | No               | 0.41            | No                   |

|    |                        |    |     |     |     |     |    |     |       |    |
|----|------------------------|----|-----|-----|-----|-----|----|-----|-------|----|
| 28 | Quercetin-3-glucoside  | No | No  | No  | No  | No  | No | No  | 0.39  | No |
| 29 | Taxifolin              | No | No  | No  | No  | No  | No | No  | -0.08 | No |
| 30 | Rutin                  | No | No  | No  | No  | No  | No | No  | -0.37 | No |
| 31 | Diosmetin              | No | No  | Yes | Yes | Yes | No | No  | 0.60  | No |
| 32 | Kaempferol-3-glucoside | No | No  | No  | No  | No  | No | No  | 0.46  | No |
| 33 | Acacetin               | No | Yes | Yes | Yes | Yes | No | Yes | 0.66  | No |
| 34 | Coumarin               | No | No  | Yes | No  | No  | No | No  | 0.97  | No |
| 35 | Pyrogallol             | No | No  | No  | No  | No  | No | No  | 0.10  | No |
| 36 | Resveratrol            | No | Yes | Yes | Yes | No  | No | No  | 0.08  | No |
| 37 | Umbelliferone          | No | No  | Yes | No  | No  | No | No  | 0.71  | No |
| 38 | Carnosol               | No | Yes | No  | Yes | No  | No | No  | 0.28  | No |
| 39 | Carnosic acid          | No | No  | No  | No  | No  | No | No  | 0.38  | No |
| 40 | Rosmanol               | No | No  | No  | No  | No  | No | No  | 0.29  | No |
| 41 | Sagerinic acid         | No | No  | No  | No  | No  | No | No  | -0.92 | No |
| 42 | 3-Methylcoumarin       | No | No  | Yes | No  | No  | No | No  | 0.96  | No |
| 43 | Polydatin              | No | No  | No  | No  | No  | No | No  | 0.06  | No |
| 44 | Scopoletin             | No | No  | Yes | No  | No  | No | No  | 0.73  | No |

Organic cation transporter 2 (OCT2)

**Table S7.** Predicted toxicity of abundant phenolic compounds

| No. | Compounds                         | AMES toxicity | MTD-H | hERG I inhibitor | hERG II inhibitor | ORAT (LD50) | LOAEL | Hepatotoxicity | Skin Sensitization | <i>T. pyriformis</i> toxicity | Minnow toxicity |
|-----|-----------------------------------|---------------|-------|------------------|-------------------|-------------|-------|----------------|--------------------|-------------------------------|-----------------|
| 1   | 3- <i>p</i> -Coumaroylquinic acid | No            | -0.09 | No               | No                | 1.74        | 2.51  | No             | No                 | 0.29                          | 4.61            |
| 2   | 3-Sinapoylquinic acid             | No            | 0.86  | No               | No                | 1.99        | 3.81  | No             | No                 | 0.29                          | 5.24            |
| 3   | Caffeic acid                      | No            | 1.15  | No               | No                | 2.38        | 2.09  | No             | No                 | 0.29                          | 2.25            |
| 4   | Chlorogenic acid                  | No            | -0.13 | No               | No                | 1.97        | 2.98  | No             | No                 | 0.29                          | 5.74            |
| 5   | Cinnamic acid                     | No            | 1.11  | No               | No                | 2.09        | 2.65  | No             | No                 | 0.25                          | 1.72            |
| 6   | Ferulic acid                      | No            | 1.08  | No               | No                | 2.28        | 2.07  | No             | No                 | 0.27                          | 1.83            |
| 7   | Gallic Acid                       | No            | 0.70  | No               | No                | 2.22        | 3.06  | No             | No                 | 0.29                          | 3.19            |
| 8   | <i>p</i> -Coumaric acid           | No            | 1.11  | No               | No                | 2.16        | 2.53  | No             | No                 | 0.32                          | 1.61            |
| 9   | <i>p</i> -Hydroxybenzoic acid     | No            | 0.85  | No               | No                | 2.26        | 2.48  | No             | No                 | 0.27                          | 1.81            |
| 10  | Protocatechuic acid               | No            | 0.81  | No               | No                | 2.42        | 2.02  | No             | No                 | 0.27                          | 2.45            |
| 11  | Quinic acid                       | No            | 1.63  | No               | No                | 1.13        | 3.53  | No             | No                 | 0.29                          | 4.87            |
| 12  | Sinapic acid                      | No            | 1.19  | No               | No                | 2.24        | 2.32  | No             | No                 | 0.26                          | 2.18            |
| 13  | Syringic acid                     | No            | 1.37  | No               | No                | 2.16        | 2.42  | No             | No                 | 0.28                          | 2.55            |
| 14  | Rosmarinic acid                   | No            | 0.15  | No               | No                | 2.81        | 2.91  | No             | No                 | 0.30                          | 2.70            |
| 15  | Chicoric acid                     | No            | 0.23  | No               | No                | 2.45        | 4.06  | No             | No                 | 0.29                          | 4.19            |
| 16  | Caftaric acid                     | No            | 0.93  | No               | No                | 2.17        | 4.23  | No             | No                 | 0.29                          | 4.87            |
| 17  | benzoic acid                      | No            | 0.61  | No               | No                | 2.17        | 2.64  | No             | No                 | 0.09                          | 1.84            |
| 18  | Vanillic acid                     | No            | 0.72  | No               | No                | 2.45        | 2.03  | No             | No                 | 0.27                          | 1.93            |
| 19  | 5-Feruloylquinic acid             | No            | 1.29  | No               | No                | 2.03        | 4.49  | No             | No                 | 0.29                          | 4.88            |
| 20  | Diosmin                           | No            | 0.57  | No               | Yes               | 2.51        | 3.34  | No             | No                 | 0.29                          | 5.35            |
| 21  | Epicatechin                       | No            | 0.44  | No               | No                | 2.43        | 2.50  | No             | No                 | 0.35                          | 3.59            |
| 22  | Isorhamnetin                      | No            | 0.58  | No               | No                | 2.41        | 2.50  | No             | No                 | 0.30                          | 2.21            |
| 23  | Kaempferol                        | No            | 0.53  | No               | No                | 2.45        | 2.51  | No             | No                 | 0.31                          | 2.89            |
| 24  | Luteolin                          | No            | 0.50  | No               | No                | 2.46        | 2.41  | No             | No                 | 0.33                          | 3.17            |
| 25  | Myricetin                         | No            | 0.51  | No               | No                | 2.50        | 2.72  | No             | No                 | 0.29                          | 5.02            |
| 26  | Procyanidin B2                    | No            | 0.44  | No               | Yes               | 2.48        | 4.35  | No             | No                 | 0.29                          | 8.70            |
| 27  | Quercetin                         | No            | 0.50  | No               | No                | 2.47        | 2.61  | No             | No                 | 0.29                          | 3.72            |
| 28  | Quercetin-3-glucoside             | No            | 0.57  | No               | Yes               | 2.54        | 4.42  | No             | No                 | 0.29                          | 8.06            |
| 29  | Taxifolin                         | No            | 0.35  | No               | No                | 2.26        | 3.10  | No             | No                 | 0.29                          | 4.69            |
| 30  | Rutin                             | No            | 0.45  | No               | Yes               | 2.49        | 3.67  | No             | No                 | 0.29                          | 7.68            |
| 31  | Diosmetin                         | No            | 0.42  | No               | No                | 2.34        | 2.27  | No             | No                 | 0.34                          | 1.74            |

|    |                        |     |       |    |     |      |      |     |    |      |       |
|----|------------------------|-----|-------|----|-----|------|------|-----|----|------|-------|
| 32 | Kaempferol-3-glucoside | No  | 0.58  | No | No  | 2.55 | 4.53 | No  | No | 0.29 | 6.74  |
| 33 | Acacetin               | No  | 0.09  | No | No  | 2.22 | 1.26 | No  | No | 0.42 | 1.00  |
| 34 | Coumarin               | No  | 0.44  | No | No  | 2.11 | 1.90 | No  | No | 0.37 | 1.56  |
| 35 | Pyrogallol             | No  | -0.27 | No | No  | 2.05 | 2.37 | No  | No | 0.13 | 2.73  |
| 36 | Resveratrol            | Yes | 0.33  | No | No  | 2.53 | 1.53 | No  | No | 0.75 | 1.52  |
| 37 | Umbelliferone          | No  | 0.69  | No | No  | 2.05 | 1.75 | Yes | No | 0.55 | 1.71  |
| 38 | Carnosol               | No  | 0.23  | No | No  | 2.19 | 1.91 | No  | No | 0.41 | -0.64 |
| 39 | Carnosic acid          | No  | 0.35  | No | No  | 2.89 | 1.97 | No  | No | 0.29 | -0.63 |
| 40 | Rosmanol               | No  | 0.33  | No | Yes | 1.98 | 2.55 | Yes | No | 0.33 | 0.29  |
| 41 | Sagerinic acid         | No  | 0.44  | No | No  | 2.48 | 5.63 | No  | No | 0.29 | 6.47  |
| 42 | 3-Methylcoumarin       | Yes | 0.27  | No | No  | 2.07 | 1.90 | Yes | No | 0.55 | 0.84  |
| 43 | Polydatin              | No  | 0.57  | No | No  | 2.52 | 4.47 | No  | No | 0.29 | 4.39  |
| 44 | Scopoletin             | No  | 0.61  | No | No  | 1.95 | 1.38 | No  | No | 0.52 | 1.61  |

Oral Rat Acute Toxicity (ORAT), Oral Rat Chronic Toxicity (LOAEL), Max. tolerated dose (human) (MTD-H)

Explanations

Minnow toxicity

LC50 values below 0.5mM (log LC50 < -0.3) are regarded as high acute toxicity.

T. Pyriformis toxicity

pIGC50 (negative logarithm of the concentration required to inhibit 50% growth in log µg/L) is considered, with a value > -0.5 log µg/L is considered toxic.

AMES toxicity: if the AMES value is positive, the compound will be mutagenic.

Maximum tolerated dose: a value less than is equal to 0.477 log(mg/kg/day) is considered low and high if greater than 0.477 log(mg/kg/day).
